# Supplementary material for: Pharmacological Overview of the BGP-15 Chemical Agent as a New Drug Candidate for the Treatment of Symptoms of Metabolic Syndrome
Source: MDPI journal article supplement (doi:10.3390/molecules25020429), 2020-01-20
Supplement: s1 [file s1]

## Supplementary Materials

**Table S1.** Summary of the investigations related to the cardiovascular effects of BGP-15.

| Main Effect                                                                                                                                                                           | Aim of the Study                                                                                                                                              | Methods                                                                                                                                                                                                                                                                                                                                             | Dose                                                         |
|---------------------------------------------------------------------------------------------------------------------------------------------------------------------------------------|---------------------------------------------------------------------------------------------------------------------------------------------------------------|-----------------------------------------------------------------------------------------------------------------------------------------------------------------------------------------------------------------------------------------------------------------------------------------------------------------------------------------------------|--------------------------------------------------------------|
| BGP-15 was able to reconstruct the diastolic dysfunction, and elevate the level of phosphorylation of VASP and phospholamban, without a significant effect on vascular function [17]. | Investigation of the effectiveness of BGP-15 in relieving cardiac dysfunction on Goto-Kakizaki rats, and comparing its effects to metformin and pioglitazone. | The experiments were carried out on Goto-Kakizaki rats<br>Determination of body weight, fasting blood glucose and plasma insulin levels<br>Echocardiography<br>Functional Vascular Assay.<br>Western blot                                                                                                                                           | 10 mg/kg<br>BGP-15, per os<br>100 mg/kg<br>metformin, per os |
| BGP-15 was able to ameliorate cardiac function and reduce arrhythmic episodes [18].                                                                                                   | Assessment of the therapeutic potential of BGP-15 in a mouse model which is able to develop heart failure and is susceptible to atrial fibrillation.          | Electrocardiogram<br>Echocardiography<br>Histological analyses<br>Western blot analysis<br>Immunoprecipitation<br>RNA extraction and Northern blotting<br>Reverse transcription–quantitative PCR<br>Microarray analysis<br>Lipidomic analysis of atria<br>IGF1 assay                                                                                | 15 mg/kg<br>BGP-15<br>50 $\mu$ M BGP-15 on the cells         |
| BGP-15 treatment resulted in endogenous HSP overexpression, and also protected against tachycardia remodeling [57].                                                                   | Treatment of <i>Drosophila melanogaster</i> with BGP-15 in tachycardia.                                                                                       | The experiments were carried out on <i>Drosophila melanogaster</i><br>Tachypacing of <i>Drosophila</i> and measurement of heart function parameters<br>Quantitative PCR<br>Western blot analysis<br>Structural evaluation by Light and Electron Microscopy<br>Calpain activity measurement                                                          | 1 mM BGP-15                                                  |
| PARP is an important target of BGP-15, and BGP-15 decreases ROS levels and cell injury during ischemia–reperfusion in the heart by the inhibition of PARP activity [11].              | Investigation of the molecular mechanism by which BGP-15 can protect the heart from ischemia–reperfusion injury in the Langendorff heart perfusion system.    | Hearts from Wistar rats have been used for the experiments<br>Assay of NAD <sup>+</sup><br>DHR probe: for detection of ROS<br>Alkaline fluorescence analysis: determination of single-strand DNA breaks<br>ADP ribosylation assay<br>Assay to Test Inhibitory Effects on PARP Enzyme<br>In Vitro<br>Lipid Peroxidation<br>Myocardial Enzyme Leakage | The medium contained 40 mg/L of BFP-15.                      |

|                                                                                                                 |                                                                                                                                                      |                                                                                                                                                                                                                                                                                                                                                                                                                    |                    |
|-----------------------------------------------------------------------------------------------------------------|------------------------------------------------------------------------------------------------------------------------------------------------------|--------------------------------------------------------------------------------------------------------------------------------------------------------------------------------------------------------------------------------------------------------------------------------------------------------------------------------------------------------------------------------------------------------------------|--------------------|
| The oxidative damage in the heart, caused by imatinib, could be reversed by the administration of BGP-15 [38].  | To identify the mechanisms by which imatinib induces cardiotoxicity and to determine how the PARP inhibitor BGP-15 can modify its progress.          | The experiments were carried out by using hearts of male Wistar rats and the Langendorff rat heart perfusion system<br>NMR spectroscopy<br>Lipid peroxidation<br>Protein oxidation<br>Western blot analysis                                                                                                                                                                                                        | 200 $\mu$ M BGP-15 |
| PARP inhibitors reduced the ischemia-reperfusion-caused mitochondrial ROS production and oxidative damage [16]. | Investigation of the effect of BGP-15 and other PARP inhibitors on oxidative cell damage caused by either ischemia-reperfusion or hydrogen peroxide. | The experiments were carried out by using hearts of male Wistar rats and the Langendorff rat heart perfusion system<br>Assay of NAD <sup>+</sup><br>Determination of DNA single-strand breaks<br>Lipid peroxidation<br>Determination of protein carbonyl content<br>Isolation of mitochondria<br>Measurement of mitochondrial enzyme activity<br>Determination of mitochondrial ROS production<br>NMR spectroscopy | 40 mg/L BGP-15     |

**Table S2.** Summary of the investigations related to the effect of BGP-15 in the therapy of DMD.

| Main Effect                                                                                                                                     | Aim of the Study                                                                               | Methods                                                                                                                                                                                                                                                                                                                                                                                                                                                                                                                                                                                                                                                                               | Dose                          |
|-------------------------------------------------------------------------------------------------------------------------------------------------|------------------------------------------------------------------------------------------------|---------------------------------------------------------------------------------------------------------------------------------------------------------------------------------------------------------------------------------------------------------------------------------------------------------------------------------------------------------------------------------------------------------------------------------------------------------------------------------------------------------------------------------------------------------------------------------------------------------------------------------------------------------------------------------------|-------------------------------|
| Treatment of dystrophic mice with BGP-15, a pharmacological co-inducer of HSP 72, improved the pathology of DMD and extended the lifetime [15]. | To test whether overexpression of Hsp72 in dystrophic muscles would ameliorate SERCA function. | Muscle functional analysis<br>Morphological analysis<br>SERCA activity assay<br>Alizarin red staining in skeletal preparations<br>Creatine kinase analysis<br>Real-time PCR<br>Western blot analysis<br>Relative SR Ca <sup>2+</sup> sensitivity<br>SR Ca <sup>2+</sup> leak<br>Caffeine-induced force responses and SR Ca <sup>2+</sup> accumulation<br>Single muscle fibre analysis<br>Wire hang test<br>Evans blue dye uptake<br>Peroxynitrite-mediated SERCA inhibition assay<br>Enriched SR isolation<br>The experiments were carried out on non-dystrophic (WT), dystrophic (mdx) and also dystrophic (dko) mice, which is the most phenotypically accurate murine model of DMD | 15 mg/kg per day, oral gavage |

|                                                                                                                                                                                                                                         |                                                                                                                                                                                                                  |                                                                                                                                                                                                                                                                                                                        |                 |
|-----------------------------------------------------------------------------------------------------------------------------------------------------------------------------------------------------------------------------------------|------------------------------------------------------------------------------------------------------------------------------------------------------------------------------------------------------------------|------------------------------------------------------------------------------------------------------------------------------------------------------------------------------------------------------------------------------------------------------------------------------------------------------------------------|-----------------|
| BGP-15 exhibits a beneficial cardiac effect by improving cardiac pathology in DMD. Although BGP-15 ameliorated some aspects of dystrophic pathology, it was not able to improve skeletal muscle function in older mdx or dko mice [46]. | Investigation into whether treatment with BGP-15 was beneficial in older mdx and dko mice when advanced pathology has already occurred. Whether BGP-15 can preserve SERCA activity in the heart was also tested. | The experiments were carried out on mdx and dko mice<br>Assessment of skeletal muscle contractile properties<br>Echocardiographic analysis of cardiac structure and function<br>Evans blue dye uptake and histology<br>Western Blot analysis<br>SERCA activity assay<br>Superoxide indicator dihydroethidium intensity | 15 mg/kg BGP-15 |
|-----------------------------------------------------------------------------------------------------------------------------------------------------------------------------------------------------------------------------------------|------------------------------------------------------------------------------------------------------------------------------------------------------------------------------------------------------------------|------------------------------------------------------------------------------------------------------------------------------------------------------------------------------------------------------------------------------------------------------------------------------------------------------------------------|-----------------|

**Table S3.** Summary of the investigations related to the chemo and cytoprotective effects of BGP-15.

| Main Effect                                                                                                                                                | Aim of the Study                                                                                                                            | Methods                                                                                                                                                                                                                                                                                                                                                                                      | Dose                                                                                                                                                                                                       |
|------------------------------------------------------------------------------------------------------------------------------------------------------------|---------------------------------------------------------------------------------------------------------------------------------------------|----------------------------------------------------------------------------------------------------------------------------------------------------------------------------------------------------------------------------------------------------------------------------------------------------------------------------------------------------------------------------------------------|------------------------------------------------------------------------------------------------------------------------------------------------------------------------------------------------------------|
| BGP-15 is a promising chemoprotective drug that can reduce the toxic side effects of taxol and cisplatin without compromising their antitumor effect [19]. | To investigate the cytoprotective effect of BGP-15 on taxol and cisplatin-induced rats.                                                     | The experiments were carried out on Wistar rats<br>Electrophysiological testing                                                                                                                                                                                                                                                                                                              | 50, 100, 200 mg/kg of BGP-15, per os, once daily through the experiment<br>1.5 mg/kg cisplatin, intraperitoneally, once daily, for 5 days<br>5 mg/kg taxol, intraperitoneally, every other day for 10 days |
| The oxidative damage in the heart, caused by imatinib, could be reversed by the administration of BGP-15 [38].                                             | To identify the mechanisms by which imatinib induces cardiotoxicity and to determine how the PARP inhibitor BGP-15 can modify its progress. | The experiments were carried out by using hearts of male Wistar rats and the Langendorff rat heart perfusion system<br>NMR spectroscopy<br>Lipid peroxidation<br>Protein oxidation<br>Western blot analysis                                                                                                                                                                                  | 200 $\mu$ M BGP-15                                                                                                                                                                                         |
| BGP-15 treatment prevented or markedly inhibited the development of acute renal failure caused by cisplatin treatment [21].                                | Investigation of the effects of BGP-15 on antitumor activity and nephrotoxicity of cisplatin.                                               | MRI analysis<br>Evaluation of the poly (ADP-ribose) content and energy metabolism in the kidney<br>NMR spectroscopy<br>Determination of renal glutathione, superoxide dismutase, catalase content<br>Protein assay<br>Evaluation of the Bcl-x(L) content of the kidney<br>Evaluation of the ROS production in rat mitochondria<br>In vitro cytotoxicity assay<br>Transplantable mouse tumors | 100, 200 mg/kg BGP-15 shortly before cisplatin treatment                                                                                                                                                   |

|                                                                                                                                                                                                                                   |                                                                                                                                                                                                      |                                                                                                                                                                                                                                                                                                                                                                                                                                                                                                                            |                                        |
|-----------------------------------------------------------------------------------------------------------------------------------------------------------------------------------------------------------------------------------|------------------------------------------------------------------------------------------------------------------------------------------------------------------------------------------------------|----------------------------------------------------------------------------------------------------------------------------------------------------------------------------------------------------------------------------------------------------------------------------------------------------------------------------------------------------------------------------------------------------------------------------------------------------------------------------------------------------------------------------|----------------------------------------|
| BGP-15 was able to improve oxidative stress and also increased enteric neuronal survival. It alleviated oxaliplatin-induced intestinal dysfunction, thus BGP-15 could relieve gastrointestinal side-effects of chemotherapy [50]. | Investigation into whether BGP-15 is able to alleviate intestinal dysfunction and oxaliplatin-induced enteric neuropathy.                                                                            | The experiment was carried out on Balb/c mice<br>Assessment of mitochondrial superoxide production<br>Mitochondrial membrane potential assay<br>Histology<br>Immunohistochemistry<br>X-ray (to study gastrointestinal transit)<br>Determination of faecal water content and colonic faecal content<br>Assessment of ex vivo motility                                                                                                                                                                                       | 15 mg/kg BGP-15<br>3 mg/kg oxaliplatin |
| BGP-15 therapy completely or partially protects skeletal muscle against deleterious side effects caused by oxaliplatin therapy [49].                                                                                              | Investigation of the effects of oxaliplatin therapy in mice on the mitochondria and skeletal system, and the capacity for BGP-15 to alleviate any pathological side-effects provoked by oxaliplatin. | Body composition analysis<br>Metabolism, voluntary exercise capacity and behavioral analysis<br>histology (Haematoxylin & Eosin staining, Oil Red O, Alizarin Red and Gomori Trichrome staining, Succinate Dehydrogenase)<br>Platinum detection in subcellular fractions<br>Atomic absorption spectrophotometry<br>Isolation of Flexor Digitorum Brevis (FDB) fibers<br>Determination of mitochondrial viability<br>Determination of mitochondrial superoxide production<br>Muscle protein extraction and Western blotting | 15 mg/kg BGP-15<br>3 mg/kg oxaliplatin |

**Table S4.** Summary of the investigation related to the effect of BGP-15 in paracetamol-induced cell death.

| Main Effect                                                                                                                                                                          | Aim of the Study                                                                        | Methods                                                                                                                                                                                                                                                                 | Dose                                                     |
|--------------------------------------------------------------------------------------------------------------------------------------------------------------------------------------|-----------------------------------------------------------------------------------------|-------------------------------------------------------------------------------------------------------------------------------------------------------------------------------------------------------------------------------------------------------------------------|----------------------------------------------------------|
| BGP-15 prevented translocation of AIF (apoptosis inducing factor) and mitochondrial depolarization. BGP-15 treatment attenuated the degree of acetaminophen provoked cell death [1]. | Investigation of the effects of BGP-15 in acetaminophen provoked hepatocellular injury. | Examination of serum samples: aspartate aminotransferase (AST) and alanine aminotransferase (ALT)<br>Western blot analysis<br>Determination of glutathione content<br>Determination of thiol-disulfide redox state (AMS labeling)<br>RNA isolation and real-time RT-PCR | 10, 20, 100, 200 mg/kg BGP-15<br>450 mg/kg acetaminophen |

Apoptosis and necrosis  
detection (staining with  
hematoxylin and eosin)  
Immunohistochemistry of  
apoptosis-inducing factor  
Bio-Rad Protein Assay

**Table S5.** Summary of the investigations related to the insulin sensitizing effect of BGP-15.

| Main Effect                                                                                                                                                                                                            | Aim of the Study                                                                                                                          | Methods                                                                                                                                                                                                                                                                                                                                                                                                                                                           | Dose                                                                                           |
|------------------------------------------------------------------------------------------------------------------------------------------------------------------------------------------------------------------------|-------------------------------------------------------------------------------------------------------------------------------------------|-------------------------------------------------------------------------------------------------------------------------------------------------------------------------------------------------------------------------------------------------------------------------------------------------------------------------------------------------------------------------------------------------------------------------------------------------------------------|------------------------------------------------------------------------------------------------|
| BGP-15 markedly decreased olanzapine-induced insulin resistance [58].                                                                                                                                                  | To investigate the effect of BGP-15 in the treatment of olanzapine-caused metabolic side effects.                                         | Randomized, double blind, parallel group, placebo-controlled single center study<br>In healthy volunteers<br>Intravenous glucose tolerance tests<br>Hyperinsulinemic-euglycemic clamps<br>Determination of body composition<br>Laboratory measurements (glucose, insulin, lipid, adiponectin and leptin determination)                                                                                                                                            | 400 mg of BGP-15 or placebo for 17 days<br>5 mg of olanzapine for 3 days and 10 mg for 14 days |
| Both the 200 and 400 mg BGP-15 dose groups showed markedly increased insulin sensitivity [3].                                                                                                                          | To quantify and demonstrate the insulin-sensitizing effect of BGP-15.                                                                     | Multiple-dose, randomized, double-blind, placebo-controlled single center study<br>Untreated, non-diabetic, insulin resistant patients<br>Intravenous glucose tolerance tests<br>Hyperinsulinemic-euglycemic clamps<br>Determination of body composition<br>Laboratory measurements (glucose, insulin, NEFA, and glycerol adiponectin leptin, and resistin)<br>Homeostasis model assessment beta cell function<br>Homeostasis model assessment insulin resistance | 200 mg or 400 mg of BGP-15, or placebo once daily, for 4 weeks                                 |
| - As an insulin sensitizer, BGP-15 produced better results than metformin and equaled the effect of rosiglitazone. It also proved to be efficient in increasing insulin sensitivity in combination with a sulfonylurea | The evaluation of the insulin-sensitizing effect of BGP-15 alone and in combination with metformin, rosiglitazone, and glibenclamide. The | Insulin sensitivity was evaluated by hyperinsulinemic euglycemic glucose (HEGC) clamp prior to and at the end of the                                                                                                                                                                                                                                                                                                                                              | 5, 10, 20, 30, or 50 mg/kg of BGP-15 per os<br>2 mg/kg rosiglitazone per os                    |

|                                                                                                                                                                                                                                                                                                                                                                                                                                     |                                                                                                                           |                                                                                                                                                                                             |                                                                                                                                                                                                                                                                                                              |
|-------------------------------------------------------------------------------------------------------------------------------------------------------------------------------------------------------------------------------------------------------------------------------------------------------------------------------------------------------------------------------------------------------------------------------------|---------------------------------------------------------------------------------------------------------------------------|---------------------------------------------------------------------------------------------------------------------------------------------------------------------------------------------|--------------------------------------------------------------------------------------------------------------------------------------------------------------------------------------------------------------------------------------------------------------------------------------------------------------|
| agent (glibenclamide).<br>Treatment with different doses of BGP-15 showed the insulin sensitizing effect in cholesterol-fed rabbits, but not in normal rabbits. These experiments confirmed that BGP-15 has a beneficial effect only in the insulin-resistant state.<br>The administration of BGP-15 was protective against streptozotocin-induced changes in vasorelaxation, which is similar to the effect of rosiglitazone [14]. | investigation of the therapeutic effect of BGP15 and rosiglitazone on vasorelaxation.                                     | treatment period, 4–6 hr after the last dose.<br>The experiments were carried out on different animal models: New Zealand rabbits, Wistar and Goto Kakizaki (GK) rats, Sprague–Dawley rats. | 100 mg/kg metformin per os<br>1 mg/kg glibenclamide per os<br>50 mg/kg streptozotocin i.v.                                                                                                                                                                                                                   |
| BGP-15 abolished the development of olanzapine-provoked insulin resistance<br>Conventional insulin sensitizers, metformin and rosiglitazone in the applied doses were ineffective [59].                                                                                                                                                                                                                                             | To compare the effect of BGP-15 with other oral antidiabetics in connection with the metabolic side effects of AAPDs.     | The experiments were carried out on Wistar rats<br>Hyperinsulinaemic Euglycaemic Glucose Clamp (HEGC)                                                                                       | 0.005 mg/kg risperidone for 21 days,<br>subcutaneously<br>20 mg/kg BGP-15 for 21 days,<br>orally<br>10 mg/kg clozapine for 2 months<br>20 mg/kg BGP-15 for 2 months<br>1 mg/kg olanzapine for 28 days<br>10 mg/kg BGP-15 for 28 days<br>100 mg/kg metformin for 28 days<br>3 mg/kg rosiglitazone for 28 days |
| BGP-15 potentiates the insulin sensitizing effect of rimonabant; this occurs at much lower doses, than expected if the two drugs were administered alone [4].                                                                                                                                                                                                                                                                       | To investigate the insulin sensitizing effect of BGP-15 in combination with rimonabant, another insulin sensitizing drug. | The experiments were carried out on Zucker obese rats<br>Hyperinsulinaemic Euglycaemic Glucose Clamp (HEGC)                                                                                 | 10 mg/kg rimonabant<br>30 mg/kg rimonabant<br>3 mg/kg BGP-15<br>10 mg/kg BGP-15 for 5 days                                                                                                                                                                                                                   |

**Table S6.** Summary of the investigations related to the effects of BGP-15 in skin injury, TBI, and VIDD.

| Main Effect                                                                                                                                                 | Aim of the Study                                                                     | Methods                                                                                                                                                                                   | Dose                                       |
|-------------------------------------------------------------------------------------------------------------------------------------------------------------|--------------------------------------------------------------------------------------|-------------------------------------------------------------------------------------------------------------------------------------------------------------------------------------------|--------------------------------------------|
| BGP-15 treatment markedly decreased the number of sunburn cells in UV radiation exposed skin; BGP-15 has a DNA protective effect if applied topically [20]. | Investigation of the protective effect of BGP-15 against injuries caused by UV rays. | The experiments were carried out on hairless mice (VAF/plus CRL: hr/hr BR)<br>Phototesting of mouse skin (determination of MED dose)<br>Treatment with BGP-15M cream, or just its vehicle | 5–20% concentration of BGP-15 in the cream |

|                                                                                                                                                                                                           |                                                                                                                                                                                                              |                                                                                                                                                                                                                                                                                                                                                                                                                                                   |                                                                 |
|-----------------------------------------------------------------------------------------------------------------------------------------------------------------------------------------------------------|--------------------------------------------------------------------------------------------------------------------------------------------------------------------------------------------------------------|---------------------------------------------------------------------------------------------------------------------------------------------------------------------------------------------------------------------------------------------------------------------------------------------------------------------------------------------------------------------------------------------------------------------------------------------------|-----------------------------------------------------------------|
|                                                                                                                                                                                                           |                                                                                                                                                                                                              | Clinical investigations<br>Histological investigations<br>Detection of sunburn cells<br>Determination of skin absorption of BGP-15 (by using <sup>14</sup> C labeled BGP-15)<br>Determination of single-strand DNA breaks<br>ADP ribosylation assay<br>Detection of ADP ribosylation by immunohistochemical analysis<br>Detection of UV induced immunosuppression by immunostaining of TNFα and IL-10                                             |                                                                 |
| Hsp70/Hsp110 have a significant role in neuronal survival after TBI, and the inducers of these heat shock proteins have beneficial effects in the reduction of the pathological consequences of TBI [22]. | Examination into whether those drugs that increase Hsp70/Hsp110 levels are able to protect cells against traumatic brain injury (TBI); mice were subjected to TBI and then BGP-15 or Celastrol were applied. | The experiments were carried out on wild type and Hsp 70/Hsp 110 deficient mice<br>Magnetic resonance imaging<br>Immunoblotting<br>Histology and immunohistochemistry<br>Microarray analysis<br>qRT-PCR<br>Neurological injury determination                                                                                                                                                                                                      | 15 mg/kg BGP-15, per os<br>1 mg/kg Celastrol, intraperitoneally |
| BGP-15 increased diaphragm muscle fiber force generation capacity, thus decreasing the negative effects of mechanical ventilation on diaphragm muscle function [23].                                      | Assessment of the therapeutic effect of BGP-15 on ventilation-induced diaphragm dysfunction (VIDD).                                                                                                          | Membrane permeabilization and single muscle fiber contractility measurements<br>Modified single fiber myosin in vitro motility assay for speed and force measurement<br>Transmission electron microscopy<br>Lipidomics and mass spectrometry<br>Proteomics and mass spectrometry<br>Respiratory chain enzymatic activity<br>In vitro SUMO2 conjugation assay<br>Total RNA isolation<br>qPCR<br>Immunoblotting<br>Isolation of SUMOylated proteins | 40 mg/kg BGP-15 iv.                                             |

**Table S7.** Summary of the investigations related to effects of BGP-15 in gynecological diseases.

| Main Effect | Aim of the Study | Methods | Dose |
|-------------|------------------|---------|------|
|-------------|------------------|---------|------|

|                                                                                                                                                       |                                                                                                                                                                  |                                                                                                                                                                                                                                                                                                                                                                                                                           |                                   |
|-------------------------------------------------------------------------------------------------------------------------------------------------------|------------------------------------------------------------------------------------------------------------------------------------------------------------------|---------------------------------------------------------------------------------------------------------------------------------------------------------------------------------------------------------------------------------------------------------------------------------------------------------------------------------------------------------------------------------------------------------------------------|-----------------------------------|
| BGP-15 reduced interstitial fibrosis and collagen deposition in the ovaries [48].                                                                     | Investigation the effects of BGP-15 in the treatment of PCOS mice.                                                                                               | The experiment was carried out on a PCOS mouse model<br>TGF- $\beta$ 1 assay<br>Testosterone assay<br>Immunohistochemistry<br>In situ hybridization<br>Histology<br>RNA extraction<br>RT and quantitative real-time PCR                                                                                                                                                                                                   | 3 mg/100g of body weight (BGP-15) |
| BGP-15 was able to restore mitochondrial activity in oocytes from obese mice, and it normalized fetal mtDNA transmission and embryo development [55]. | Testing the ability of BGP-15 in terms of whether it reverses effects of obesity, and if it is able to restore embryo development.                               | Metabolite and endocrine measurements<br>RNA isolation<br>Real-time reverse transcription (RT)-PCR<br>Lipid droplet staining<br>Immunocytochemistry<br>Analysis of oocyte mitochondrial membrane potential and autophagy<br>Quantification of mtDNA copy number and sequence variants                                                                                                                                     | 100 mg/kg BGP-15                  |
| Administration of BGP-15 significantly reduced abnormal weight gain after pregnancy [56].                                                             | Assessment of the changes in glucose and lipid metabolisms levels after activation of Hsp70 with BGP-15.                                                         | ELISA<br>Determination of glucose, total cholesterol and triglyceride levels from blood samples<br>BAT (brown adipose tissue) thermal imaging and analysis<br>Immunohistochemistry                                                                                                                                                                                                                                        | 100 mg/kg BGP-15                  |
| BGP-15 can be a new mitochondrial drug candidate for preventing ROS-related and inflammatory disease progression [24].                                | Investigation into whether the protective effects of BGP-15 are in connection with reducing mitochondrial ROS production and preserving mitochondrial integrity. | HPLC-MS/MS analysis<br>Cell viability assay<br>Determination of reactive oxygen species in cell culture<br>Determination of mitochondrial production of reactive oxygen species<br>Construction of mitochondria directed enhanced red fluorescent protein<br>JC-1 assay for fluorescent microscopy<br>Tetramethylrhodamine methyl ester (TMRM) assay<br>Identification of the type of cell death by annexin V/PI staining | 50 $\mu$ M BGP-15                 |
